# Supplementary material
Source: publisher figshare collection journal article supplement (https://tandf.figshare.com/articles/dataset/_/9824318)
Supplement: Supplementary file 2 [file 2]

Archive with 3 entries (3 files):
- tplb_a_1651780_sm6624.docx
- tplb_a_1651780_sm6623.docx
- tplb_a_1651780_sm6622.pdf
