# Supplementary material
Source: publisher figshare collection journal article supplement (https://tandf.figshare.com/articles/dataset/_/9824318)
Supplement: Supplementary file 2 [file 2 › tplb_a_1651780_sm6623.docx]

**Supporting information**

**Species and functional differences between subalpine grasslands with and without dwarf shrub encroachment**

**Supplement 2.** Trait Data of the *Nardus*–vegetation type, and *Vaccinium*–vegetation type, central part of Balkan Mountain Range, Bulgaria.

*Explanatory notes*

Data for three plant traits was sourced externally or determined at the specific study site for every taxon detected during the Species Data survey (See methods section and Supplement 1 for further details). The three traits of focus were; specific leaf area (SLA), seed mass (SM), and maximum plant height (H). The manual collection and collation trait data from the field occurred in summer 2016 following the Pérez-Harguindeguy et al. (2013) trait handbook. The presented original values are mean values from several measurements, as recommended in the handbook. The trait data sourced from freely available databases were checked with the goal of selecting records which were derived from putatively similar habitats. The data source (i.e., external trait database or manual collection and collation of the data from the field) is featured in Supplement S2, Table S2.

**Table S2.** Trait Data collected for every taxon detected at the study sites during collection of the Species Data. Information sources: 1–Flora of Republic of Bulgaria (Jordanov 1963-1979, Velčev 1982, 1989, Kožhuharov 1995, Ančev 2012), 2–TRY database (Kattge et al. 2011), 3–LEDA database (Kleyer et al. 2008), 4– Royal Botanic Gardens Kew (2018), 5–New field measurements, 6–Private database from one of the co-authors, and 7–Trait data was derived by expert decision from estimates of closely related taxa as records were not available in free to access databases, and it was not possible to obtain field measurements. Non-shaded values were newly field measurements, light grey was data derived from databases and literature, and dark grey by expert decision. The nomenclature of plants follows Euro+Med Plant Base (2006-2018).

| **Species** | **H (cm)** | **SLA**  **(mm2mg-1)** | **SM (mg)** | Information sources |
| --- | --- | --- | --- | --- |
| *Achillea millefolium* aggr. | 45.00 | 26.70 | 0.16 | 1,2 |
| *Agrostis capillaris* | 50.00 | 30.80 | 0.06 | 1,2 |
| *Alchemilla flabelata* | 20.00 | 23.65 | 0.40 | 1,5, |
| *Anthoxanthum odoratum* | 50.00 | 27.30 | 0.63 | 1,2 |
| *Avenella flexuosa* | 130.00 | 23.32 | 0.60 | 1,2 |
| *Bellardiochloa variegata* | 50.00 | 16.00 | 0.60 | 1,7 |
| *Bistorta officinalis* | 130.00 | 27.66 | 2.25 | 1,3 |
| *Bruckenthalia spiculifolia* | 25.00 | 14.01 | 0.02 | 1,5,4 |
| *Calamagrostis arundinacea* | 120.00 | 18.50 | 0.39 | 1,2 |
| *Campanula patula* | 70.00 | 34.89 | 0.02 | 1,2 |
| *Campanula rotundifolia* | 35.00 | 48.44 | 0.04 | 1,5 |
| *Carex caryophyllea* | 15.00 | 23.00 | 0.77 | 1,2 |
| *Cerastium banaticum* | 40.00 | 29.20 | 0.51 | 1,3,4 |
| *Crocus veluchensis* | 18.00 | 12.00 | 4.90 | 1,7 |
| *Cruciata glabra* | 25.00 | 9.00 | 1.43 | 1,2 |
| *Cytisus austriacus* | 70.00 | 25.00 | 3.12 | 1,6 |
| *Danthonia alpina* | 60.00 | 16.39 | 1.29 | 1,3,5 |
| *Epilobium angustifolium* | 200.00 | 28.40 | 0.42 | 1,3,4 |
| *Festuca nigrescens* | 70.00 | 17.70 | 1.82 | 1,2 |
| *Festuca valesiaca* | 80.00 | 12.06 | 0.49 | 1,6 |
| *Galium verum* | 30.00 | 24.10 | 0.40 | 1,2 |
| *Genista depressa* | 20.00 | 58.70 | 2.80 | 1,5 |
| *Homogyne alpina* | 40.00 | 16.64 | 0.90 | 1,6,4 |
| *Hypericum linarioides* | 40.00 | 31.70 | 0.14 | 1,5 |
| *Hypericum maculatum* | 60.00 | 22.73 | 0.03 | 1,2 |
| *Juniperus communis subsp. nana* | 127.00 | 6.50 | 16.20 | 5,6 |
| *Leontodon hispidus* | 60.00 | 28.80 | 0.93 | 1,3,4 |
| *Luzula luzuloides* | 70.00 | 23.76 | 0.30 | 1,2 |
| *Luzula spicata subsp. italica* | 10.00 | 21.81 | 0.26 | 1,5 |
| *Luzula sudetica* | 30.00 | 32.78 | 0.36 | 1,2,5 |
| *Nardus stricta* | 40.00 | 10.20 | 0.32 | 1,2 |
| *Noccaea kovatsii* | 60.00 | 22.75 | 0.42 | 1,7 |
| *Pilosella hoppeana* | 90.00 | 24.29 | 0.27 | 1,2,4 |
| *Pilosella officinarum* | 90.00 | 24.29 | 0.18 | 1,2 |
| *Plantago subulata* | 20.00 | 19.50 | 0.71 | 1,5 |
| *Polygonum rurivagum* | 60.00 | 32.40 | 1.83 | 1,3 |
| *Potentilla erecta* | 15.00 | 21.70 | 0.58 | 1,2 |
| *Potentilla aurea subsp. chrysocraspeda* | 20.00 | 17.03 | 0.34 | 1,6,4 |
| *Ranunculus montanus* | 40.00 | 24.30 | 2.40 | 1,6,4 |
| *Ranunculus polyanthemos* | 60.00 | 25.10 | 3.30 | 1,2 |
| *Rumex acetosella* | 30.00 | 21.50 | 0.40 | 1,2 |
| *Scleranthus perennis* | 25.00 | 18.93 | 1.03 | 1,2 |
| *Scorzoneroides autumnalis* | 15.00 | 20.55 | 0.70 | 1,3,4 |
| *Stellaria graminea* | 50.00 | 32.90 | 0.07 | 1,2 |
| *Thymus longicaulis* | 15.00 | 24.73 | 0.12 | 1,5,4 |
| *Thymus praecox* | 18.00 | 24.70 | 0.08 | 1,3 |
| *Trifolium repens* | 10.00 | 49.49 | 0.44 | 1,5 |
| *Vaccinium myrtillus* | 55.00 | 17.30 | 0.28 | 1,2 |
| *Vaccinium uliginosum* | 70.00 | 15.68 | 0.20 | 1,2 |
| *Vaccinium vitis-idaea* | 30.00 | 4.87 | 0.30 | 1,2 |
| *Verbascum longifolium* | 150.00 | 13.64 | 0.08 | 1,2 |
| *Veronica chamaedrys* | 10.00 | 27.10 | 0.19 | 1,2 |
| *Veronica officinalis* | 45.00 | 25.38 | 0.13 | 1,2 |
| *Viola dacica* | 40.00 | 39.38 | 0.60 | 1,5,4 |
| *Viola tricolor* | 40.00 | 39.38 | 0.90 | 1,5,4 |

**References**

Ančev M. editor. 2012. Flora na Narodna Republika Balgaria. [Flora of Republic of Bulgaria]. Vol. 11. Sofia: Prof. Marin Drinov Publishing House of BAS. Bulgarian.

Euro+Med. 2006. Euro+Med PlantBase - the information resource for Euro-Mediterranean plant diversity. Published on the Internet http://ww2.bgbm.org/EuroPlusMed/ [accessed 13 September 2018].

Jordanov D. editor. 1963 - 1979. Flora na Narodna Republika Balgaria. [Flora of Republic of Bulgaria]. Vol. 1-7. Sofia: Publishing House of BAS. Bulgarian.

Kattge J, Díaz S, Lavorel S, Prentice IC, Leadley P, Bönisch G, Garnier E, Westoby M, Reich PB, Wright IJ, et al. 2011. TRY – a global database of plant traits. Global Change Biol. 17: 2905–2935.

Kleyer M, Bekker RM, Knevel IC, Bakker JP, Thompson K, Sonnenschein M, Poschlod P, van Groenendael JM, Klimes L, Klimesová J et al. 2008. The LEDA Traitbase: A database of life-history traits of Northwest European flora. J Ecol. 96: 1266–1274.

Kožhuharov, S. editor. 1995. Flora na Narodna Republika Balgaria. [Flora of Republic of Bulgaria]. Vol. 10. Sofia: Prof. Marin Drinov Publishing House of BAS. Bulgarian.

Pérez-Harguindeguy N, Díaz S, Garnier E, Lavorel S, Poorter H, Jaureguiberry P, Bret-Harte MS, Cornwell WK, Craine JM, Gurvich DE, et al. 2013. New handbook for standardised measurement of plant functional traits worldwide. Aust J Bot. 61: 167–234.

Royal Botanic Gardens Kew. 2018. Seed Information Database (SID). Version 7.1. http://data.kew.org/sid/

Velčev, V. 1982, 1989. editor. Flora na Narodna Republika Balgaria. [Flora of Republic of Bulgaria]. Vol. 8, 9. Sofia: Publishing House of BAS. Bulgarian.
