# Supplementary material
Source: publisher figshare collection journal article supplement (https://tandf.figshare.com/articles/dataset/_/9824318)
Supplement: Supplementary file 2 [file 2 › tplb_a_1651780_sm6624.docx]

**Supporting information**

**Species and functional differences between subalpine grasslands with and without dwarf shrub encroachment**

**Supplement 3.** Synoptic table of the *Nardus*–vegetation type and *Vaccinium*–vegetation type, central part of Balkan Mountain Range, Bulgaria.

**Table S3.** Full version of the ordered synoptic table of the Balkan Mountain Species Data, Bulgaria. The body of the table contains species fidelity (Phi multiplied by 100), percentage constancy and the average species cover (Avg. cover) within the two vegetation types. All species with phi values ≥ 20 in one of the communities are considered characteristic and are highlighted in grey. The nomenclature of plants follows Euro+Med Plant Base (2006-2018).

|  | **N**–**type** | | | | **V**–**type** | | | | |
| --- | --- | --- | --- | --- | --- | --- | --- | --- | --- |
| number of plots: | 18 | | | | 18 | | | | |
|  | *Phi* | | *Frequency* | *Avg. cover* | *Phi* | *Frequency* | | | *Avg. cover* |
| *Festuca valesiaca* | 24.3 | 11 | | 0.1 | --- | | --- | 0.0 | |
| *Danthonia alpina* | 24.3 | 11 | | 0.1 | --- | | --- | 0.0 | |
| *Bellardiochloa variegata* | 18.1 | 39 | | 4.8 | --- | | 22 | 0.9 | |
| *Potentilla aurea subsp. chrysocraspeda* | 17.3 | 44 | | 0.3 | --- | | 28 | 0.1 | |
| *Festuca nigrescens* | 16.9 | 100 | | 20.0 | --- | | 94 | 17.8 | |
| *Nardus stricta* | 16.9 | 100 | | 38.1 | --- | | 94 | 11.5 | |
| *Pilosella officinarum* | 16.9 | 6 | | 0.0 | --- | | --- | 0.0 | |
| *Plantago subulata* | 16.9 | 6 | | 0.1 | --- | | --- | 0.0 | |
| *Scleranthus perennis* | 16.9 | 6 | | 0.1 | --- | | --- | 0.0 | |
| *Luzula spicata subsp. italica* | 10.1 | 11 | | 0.4 | --- | | 6 | 0.0 | |
| *Agrostis capillaris* | --- | 94 | | 15.4 | 16.9 | | 100 | 9.7 | |
| *Avenella flexuosa* | --- | 94 | | 9.6 | 16.9 | | 100 | 13.7 | |
| *Luzula sudetica* | --- | 78 | | 1.6 | 14.9 | | 89 | 1.8 | |
| *Anthoxanthum odoratum* | --- | 56 | | 0.8 | 5.6 | | 61 | 1.5 | |
| *Vaccinium vitis-idaea* | --- | 17 | | 0.3 | 84.5 | | 100 | 5.9 | |
| *Vaccinium myrtillus* | --- | 44 | | 1.3 | 62 | | 100 | 17.2 | |
| *Bruckenthalia spiculifolia* | --- | 11 | | 0.2 | 57 | | 67 | 2.6 | |
| *Juniperus communis subsp. nana* | --- | --- | | 0.0 | 57.7 | | 50 | 4.2 | |
| *Luzula luzuloides* | --- | 44 | | 3.3 | 54.3 | | 94 | 6.7 | |
| *Campanula rotundifoliaa* | --- | 50 | | 0.3 | 49.6 | | 94 | 1.7 | |
| *Bistorta officinalis* | --- | 11 | | 0.0 | 42.2 | | 50 | 0.7 | |
| *Potentilla erecta* | --- | 11 | | 0.1 | 42.2 | | 50 | 0.2 | |
| *Homogyne alpina* | --- | --- | | 0.0 | 40.2 | | 28 | 0.1 | |
| *Hypericum maculatum* | --- | --- | | 0.0 | 40.2 | | 28 | 0.7 | |
| *Cruciata glabra* | --- | 11 | | 0.1 | 37.2 | | 44 | 0.3 | |
| *Thymus longicaulis* | --- | 17 | | 0.2 | 35.4 | | 50 | 0.9 | |
| *Trifolium repens* | --- | --- | | 0.0 | 35.4 | | 22 | 0.3 | |
| *Vaccinium uliginosum* | --- | 6 | | 0.1 | 35.1 | | 33 | 2.9 | |
| *Genista depresa* | --- | 17 | | 0.1 | 30.2 | | 44 | 0.8 | |
| *Alchemilla flabelata* | --- | --- | | 0.0 | 30.2 | | 17 | 2.0 | |
| *Calamagrostis arundinaceae* | --- | --- | | 0.0 | 30.2 | | 17 | 2.1 | |
| *Veronica chamaedris* | --- | --- | | 0.2 | 30.2 | | 17 | 0.2 | |
| *Stellaria graminea* | --- | 44 | | 0.5 | 28.2 | | 72 | 1.0 | |
| *Chamaecytisus austriacus* | --- | --- | | 0.0 | 24.3 | | 11 | 0.1 | |
| *Noccaea kovatsii* | --- | --- | | 0.0 | 24.3 | | 11 | 0.1 | |
| *Thymus praecox* | --- | 6 | | 0.1 | 24.1 | | 22 | 0.2 | |
| *Polygonum rurivagum* | --- | 11 | | 0.1 | 21.1 | | 28 | 0.3 | |
| *Carex caryophyllea* | --- | 22 | | 0.4 | 18.1 | | 39 | 0.9 | |
| *Campanula patula* | --- | --- | | 0.0 | 16.9 | | 6 | 0.0 | |
| *Epilobium angustifolium* | --- | --- | | 0.0 | 16.9 | | 6 | 0.1 | |
| *Galium verum* | --- | --- | | 0.0 | 16.9 | | 6 | 0.0 | |
| *Hypericum linarioides* | --- | --- | | 0.0 | 16.9 | | 6 | 0.1 | |
| *Scorzoneroides autumnalis* | --- | --- | | 0.0 | 16.9 | | 6 | 0.1 | |
| *Leontodon hispidus* | --- | --- | | 0.0 | 16.9 | | 6 | 0.0 | |
| *Ranunculus polyanthemos* | --- | --- | | 0.0 | 16.9 | | 6 | 0.1 | |
| *Veronica officinalis* | --- | 6 | | 0.0 | 10.1 | | 11 | 0.1 | |
| *Crocus veluchensis* | --- | 17 | | 0.1 | 7 | | 22 | 0.1 | |
| *Verbascum longifolium* | --- | 39 | | 0.0 | --- | | 39 | 0.3 | |
| *Cerastium banaticum* | --- | 33 | | 0.3 | --- | | 33 | 0.2 | |
| *Rumex acetosella* | --- | 17 | | 0.1 | --- | | 17 | 0.1 | |
| *Viola dacica* | --- | 17 | | 0.1 | --- | | 17 | 0.1 | |
| *Pilosella hoppeana* | 8 | 17 | | 0.1 | --- | | 11 | 0.0 | |
| *Achillea millefolium* aggr. | --- | 11 | | 0.1 | --- | | 11 | 0.1 | |
| *Ranunculus montanus* | --- | 6 | | 0.0 | --- | | 6 | 0.0 | |
| *Viola tricolor* | --- | 6 | | 0.0 | --- | | 6 | 0.1 | |
| *Crocus veluchensis* | --- | 17 | | 0.1 | 7 | | 22 | 0.1 | |
